# Supplementary material for: Annealing effect on UV-illuminated recovery in gas response of graphene-based NO2 sensors
Source: Royal Society of Chemistry journal article supplement (doi:10.1039/c9ra01295h), 2019-01-01
Supplement: c9ra01295h1.pdf [file c9ra01295h1.pdf]

## Supplementary Information

### Annealing effect on UV-illuminated recovery in gas response of graphene-based NO<sub>2</sub> sensors

*Chia-Ming Yang*<sup>\*a,b,c,d</sup>, *Tsung-Cheng Chen*<sup>a</sup>, *Yu-Cheng Yang*<sup>a,b</sup>, *M. Meyyappan*<sup>e</sup>

a Department of Electronic Engineering, Chang-Gung University, Taoyuan 333, Taiwan

b Institute of Electro-Optical Engineering, Chang Gung University, Taoyuan 333, Taiwan

c Biosensor Group, Biomedical Engineering Research Center, Chang Gung University, Taoyuan 333, Taiwan

d Department of General Surgery, Chang Gung Memorial Hospital, Linkou 333, Taiwan

e Center for Nanotechnology, NASA Ames Research Center, Moffett Field, CA 94035, USA

Corresponding author: [cmyang@mail.cgu.edu.tw](mailto:cmyang@mail.cgu.edu.tw); Tel.: +886-3-2118800#5960

C.-M. Yang and T.-C. Chen contributed equally to this work.

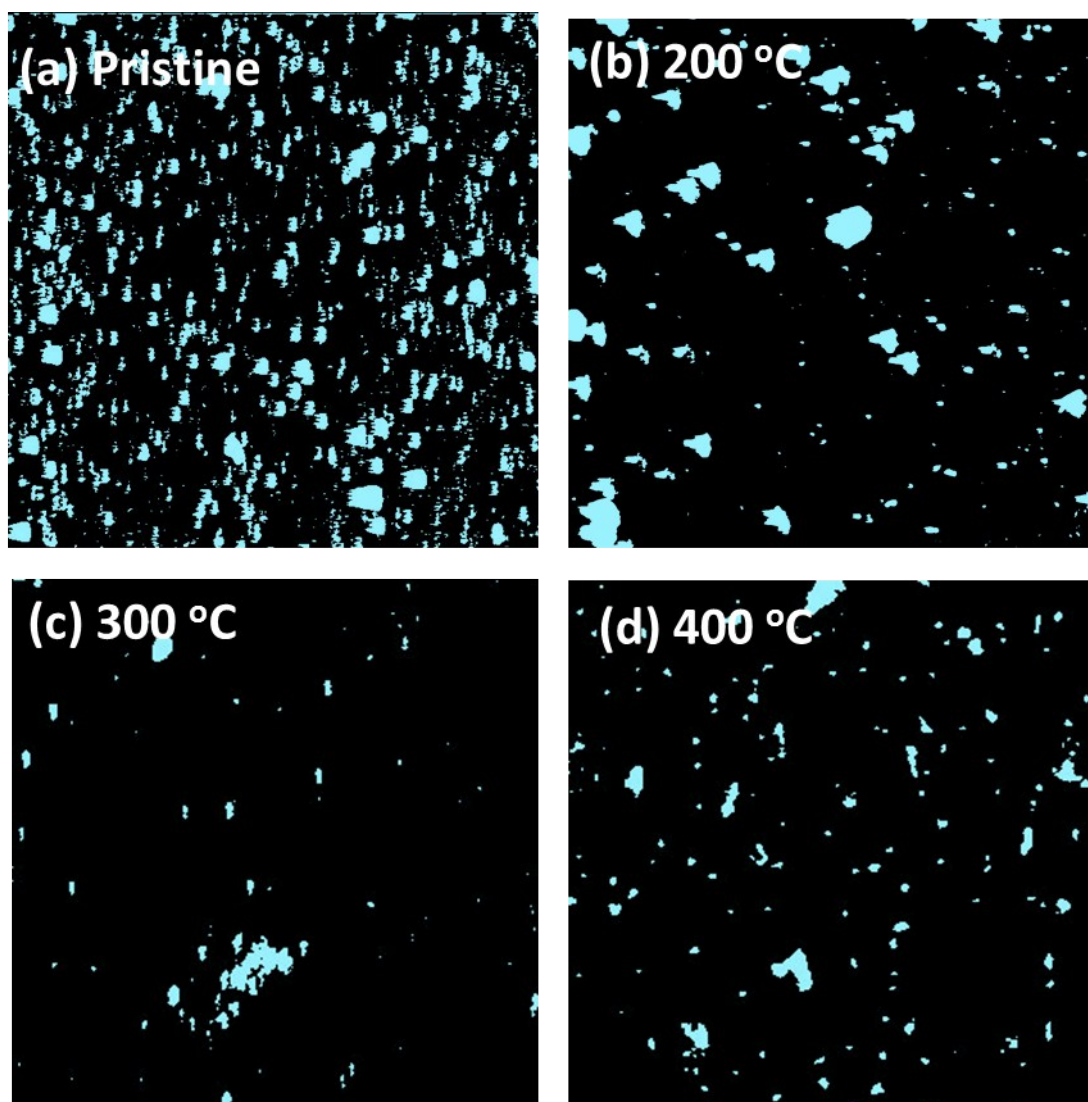

**Fig. S1** AFM images analyzed in imageJ software: (a) pristine graphene and with annealing at (b) 200 °C, (c) 300 °C and (d) 400 °C. The red area could be referred to PMMA residues with a threshold value setting.

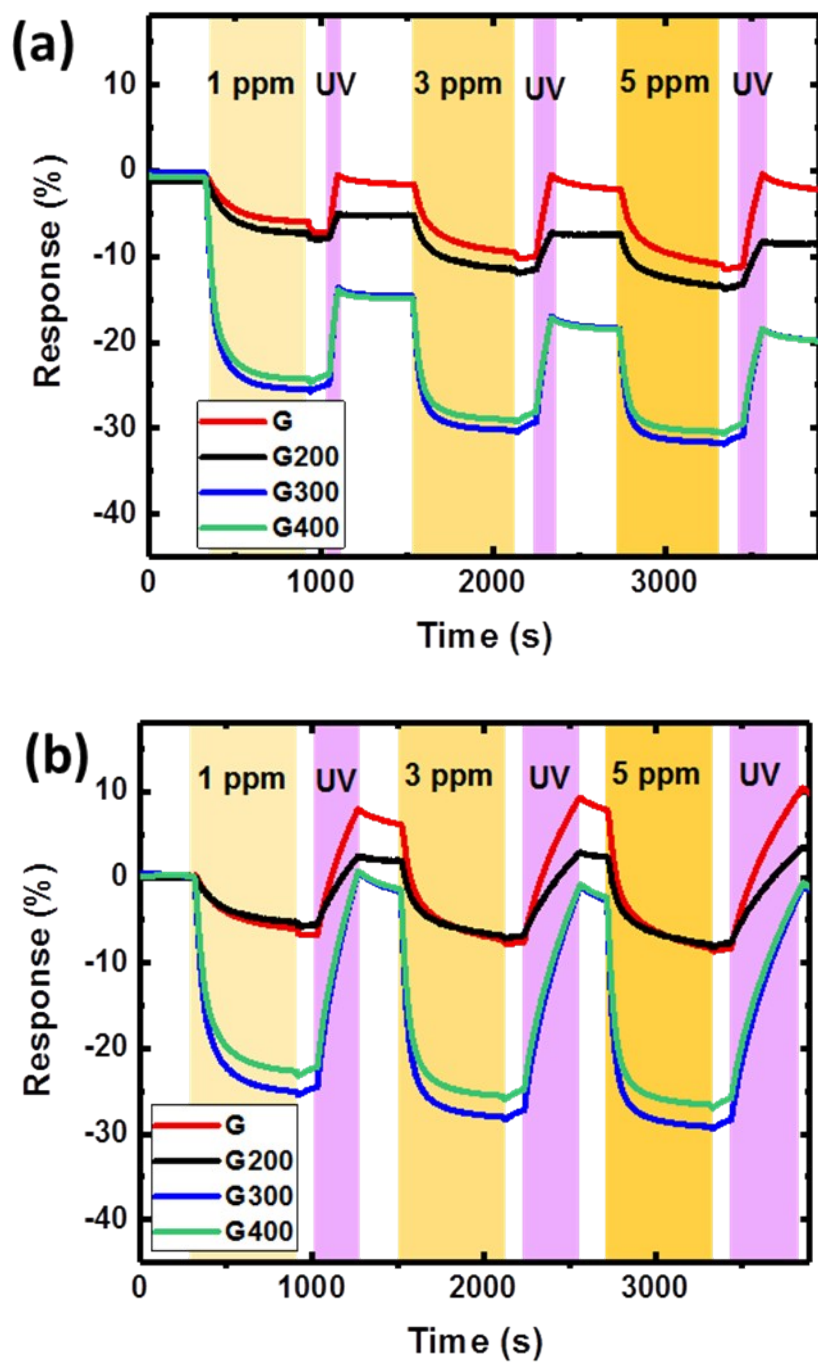

**Fig. S2** Dynamic response versus time for the device treated with RTA at different temperatures and exposure to various concentrations of NO<sub>2</sub> with UV illumination during the recovery time. The illumination time is decided by the full recovery of the response of (a) the “G” device and (b) the “G300” device.

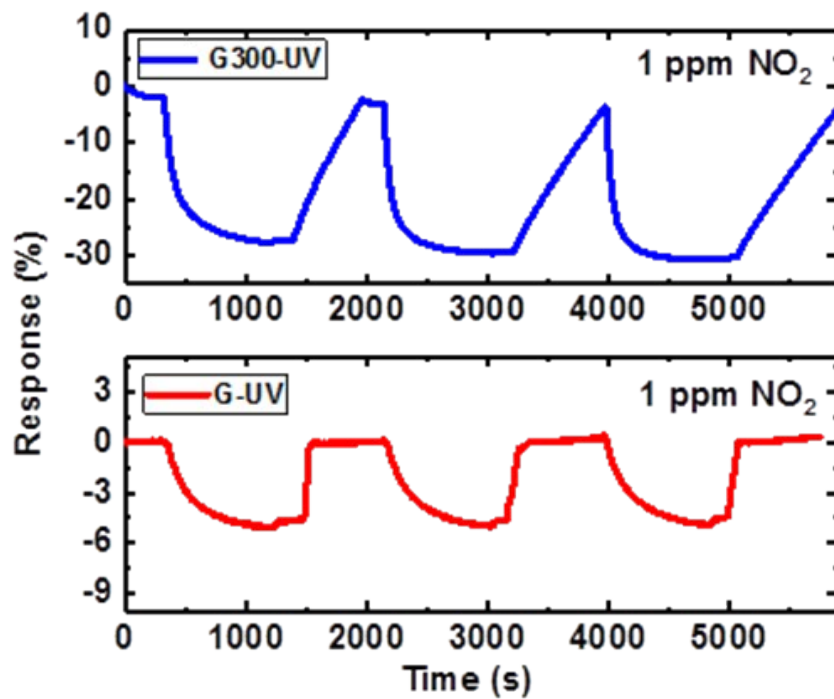

**Fig. S3** Repeatability and stability studies of the graphene sensors exposed to 1 ppm of NO<sub>2</sub>.

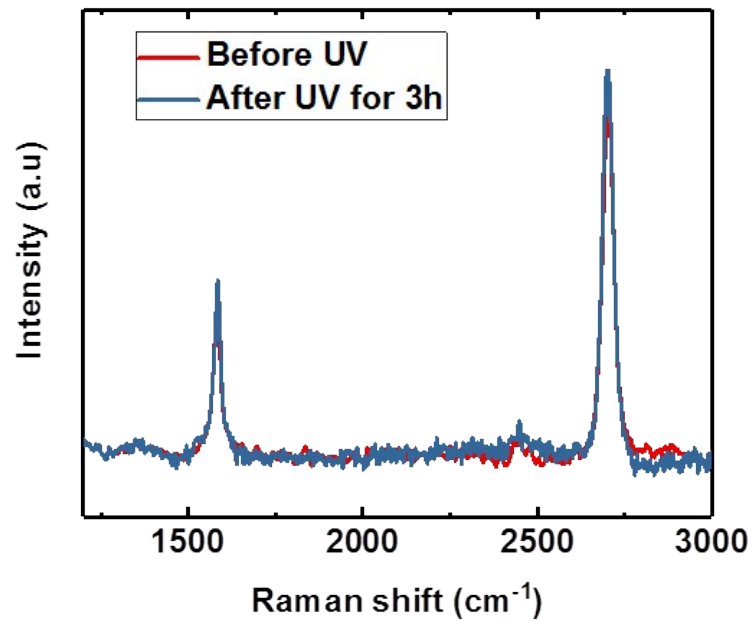

**Fig. S4** Raman spectra of the pristine monolayer graphene before and after UV illumination for 3h.
